# Supplementary material
Source: PubMed Central journal article supplement (PMC4275842)
Supplement: NIHMS650138-supplement-01.pdf [file NIHMS650138-supplement-01.pdf]

## **SUPPLEMENTAL MATERIAL**

**Supplemental Material Videos are available at <http://wjpcchs.sagepub.com/supplemental>.**

**Supplemental Video 1.** Transthoracic echocardiogram demonstrating the thrombus (arrow) crossing the aortic valve with each systolic contraction. Ao indicates aorta; LA, left atrium; LV, left ventricle.

**Supplemental Video 2.** Transesophageal echocardiogram revealing the mobile thrombus (arrow) traversing the aortic valve in systole, immediately prior to thrombectomy. Ao indicates aorta; LA, left atrium; LV, left ventricle.
